# Supplementary material for: Collaborative Filtering Recommendation on Users’ Interest Sequences
Source: PLoS One. 2016 May 19;11(5):e0155739. doi: 10.1371/journal.pone.0155739 (PMC4873175; doi:10.1371/journal.pone.0155739)
Supplement: S1 File — (XLS) [file pone.0155739.s001.xls]

## Sheet: Sheet1
Ciao MAE						Ciao RMSE
K	UCF	UDI	ISCF			K	UCF	UDI	ISCF
10	0.7787	0.7797	0.778			10	1.0082	1.0135	1.0076
20	0.7787	0.7796	0.778			20	1.0081	1.0135	1.0076
30	0.7787	0.7796	0.778			30	1.0081	1.0135	1.0076
40	0.7787	0.7796	0.778			40	1.0081	1.0135	1.0076
50	0.7787	0.7796	0.778			50	1.0081	1.0135	1.0076
60	0.7787	0.7796	0.778			60	1.0081	1.0135	1.0076
70	0.7787	0.7796	0.778			70	1.0081	1.0135	1.0076
80	0.7787	0.7796	0.778			80	1.0081	1.0135	1.0076
90	0.7787	0.7796	0.778			90	1.0081	1.0135	1.0076
100	0.7787	0.7796	0.778			100	1.0081	1.0135	1.0076
flixster MAE						flixster RMSE
K	UCF	UDI	ISCF			K	UCF	UDI	ISCF
10	0.738	0.7581	0.733			10	0.9705	1.0038	0.9667
20	0.7293	0.7534	0.7265			20	0.9614	0.9988	0.9596
30	0.7277	0.7523	0.7256			30	0.9599	0.9977	0.9586
40	0.7273	0.752	0.7253			40	0.9596	0.9974	0.9584
50	0.7272	0.7519	0.7253			50	0.9596	0.9973	0.9584
60	0.7272	0.7519	0.7254			60	0.9596	0.9973	0.9585
70	0.7271	0.7518	0.7254			70	0.9596	0.9973	0.9585
80	0.7272	0.7518	0.7254			80	0.9596	0.9973	0.9585
90	0.7272	0.7518	0.7254			90	0.9596	0.9973	0.9585
100	0.7272	0.7518	0.7254			100	0.9596	0.9973	0.9585
MovieLens100k MAE						MovieLens100k RMSE
K	UCF	UDI	ISCF			K	UCF	UDI	ISCF
10	0.7746	0.7533	0.7501			10	0.9862	0.9683	0.9602
20	0.7583	0.7449	0.7425			20	0.9667	0.9573	0.9502
30	0.7535	0.7432	0.7413			30	0.961	0.9549	0.9488
40	0.7515	0.7429	0.7415			40	0.9587	0.9543	0.9485
50	0.7507	0.7429	0.742			50	0.9578	0.9541	0.949
60	0.7504	0.7431	0.7425			60	0.9574	0.9541	0.9494
70	0.7502	0.7432	0.7428			70	0.9572	0.9541	0.9498
80	0.7502	0.7433	0.7432			80	0.9572	0.9542	0.9501
90	0.7503	0.7434	0.7435			90	0.9572	0.9542	0.9504
100	0.7503	0.7435	0.7437			100	0.9572	0.9542	0.9505
MovieLens latest small MAE						MovieLens latest small RMSE
K	UCF	UDI	ISCF			K	UCF	UDI	ISCF
10	0.7412	0.735	0.7279			10	0.9651	0.9643	0.9514
20	0.7301	0.7299	0.7225			20	0.9529	0.9581	0.9451
30	0.7279	0.729	0.7216			30	0.9505	0.9568	0.9442
40	0.7271	0.7287	0.7216			40	0.9498	0.9564	0.9444
50	0.727	0.7286	0.7218			50	0.9497	0.9563	0.9446
60	0.727	0.7286	0.7221			60	0.9497	0.9563	0.9448
70	0.727	0.7287	0.7222			70	0.9497	0.9563	0.945
80	0.7271	0.7287	0.7223			80	0.9497	0.9563	0.9451
90	0.7271	0.7287	0.7224			90	0.9498	0.9563	0.9452
100	0.7272	0.7287	0.7225			100	0.9498	0.9563	0.9452
